# Supplementary material for: The combined action of cations and anions of ionic liquids modulates the formation and stability of G-quadruplex DNA
Source: Royal Society of Chemistry journal article supplement (doi:10.1039/d1cp03730g), 2021-01-01
Supplement: d1cp03730g1.pdf [file d1cp03730g1.pdf]

### Supporting Information

#### The combined action of cation and anion of ionic liquids modulates the formation and stability of G-quadruplex DNA

Sunipa Sarkar\*, Prashant Chandra Singh

School of Chemical Sciences,

Indian Association for the Cultivation of Science,

Kolkata, India, 700032

\*spss4@iacs.res.in

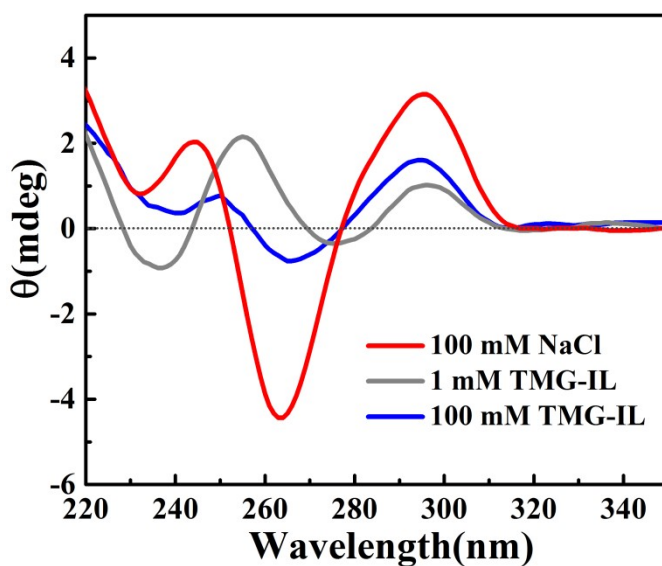

**Figure S1:** Formation of antiparallel G-quadruplex structure depending on the concentration of TMG-IL.

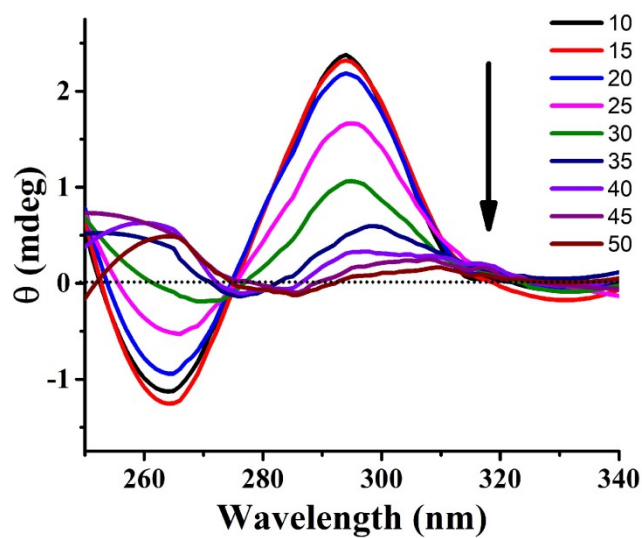

**Figure S2:** (a) Temperature dependent CD spectra of Gq in presence of IL (one representative case has been shown here).

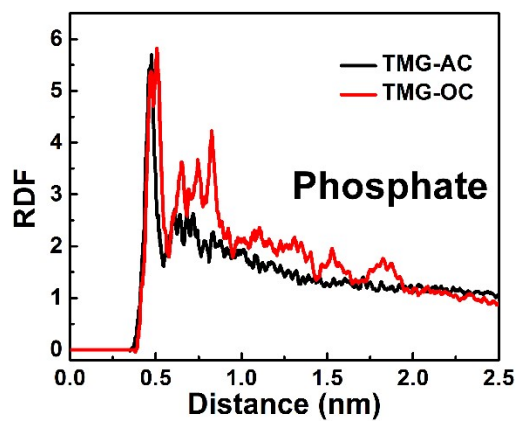

**Figure S3:** (a) Radial distribution function (RDF) of cation of both the ILs around phosphate region. P atom of the phosphate region and central C of the TMG cation are used for the calculation.

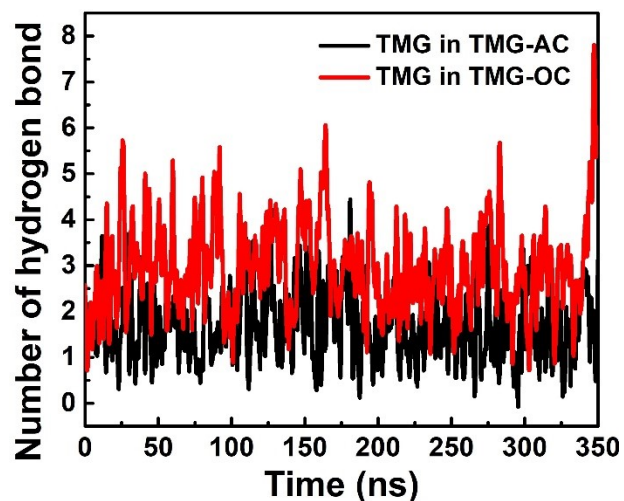

**Figure S4:** Hydrogen bonding of the TMG cations with the whole Gq DNA for TMG-AC (black line) and TMG-OC (red line).

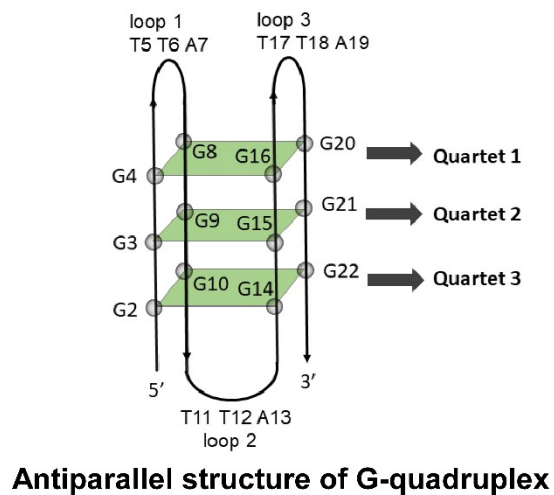

**Figure S5:** Antiparallel form of Gq DNA with numbering of the bases in the quartet and loop regions.
